# Supplementary material
Source: PubMed Central journal article supplement (PMC6203668)
Supplement: NIHMS967240-supplement-supplement_1.pdf [file NIHMS967240-supplement-supplement_1.pdf]

**Appendix Table 1. Comparison of summary statistics between first vs. second VCTE exam**

|            | First exam | Second exam | Mean (First, Second) exam | Difference (First – Second) exam |
|------------|------------|-------------|---------------------------|----------------------------------|
| LSM – kPa  |            |             |                           |                                  |
| N          | 385        | 375         | 393                       | 367                              |
| Mean       | 10.9       | 11.0        | 11.0                      | -0.2*                            |
| SD         | 10.9       | 11.4        | 11.0                      | 4.4                              |
|            |            |             |                           |                                  |
| CAP – dB/m |            |             |                           |                                  |
| N          | 358        | 352         | 358                       | 352                              |
| Mean       | 319        | 320         | 319                       | 0†                               |
| SD         | 50         | 52          | 48                        | 36                               |

\*P-value from t-test of Difference=0 is 0.32

†P-value from t-test of Difference=0 is 0.97

**Appendix Table 2. Comparison of diagnostic performance between first vs. second VCTE exam**

| Predictor  | Outcome                       | AUROC      |             | P-value |
|------------|-------------------------------|------------|-------------|---------|
|            |                               | First exam | Second exam |         |
| <b>LSM</b> | Fibrosis stage<br>0 vs 1-4    | 0.74       | 0.76        | 0.72    |
|            | Fibrosis stage<br>0-1 vs 2-4  | 0.80       | 0.79        | 0.78    |
|            | Fibrosis stage<br>0-2 vs 3-4  | 0.84       | 0.83        | 0.70    |
|            | Fibrosis stage<br>0-3 vs 4    | 0.93       | 0.94        | 0.53    |
| <b>CAP</b> | Steatosis grade<br>0 vs 1-3   | 0.78       | 0.76        | 0.86    |
|            | Steatosis grade<br>0-1 vs 2-3 | 0.70       | 0.68        | 0.64    |
|            | Steatosis grade<br>0-2 vs 3   | 0.61       | 0.56        | 0.25    |

**Appendix Table 3. Linear regressions of Liver Stiffness Measurement (LSM) on NAFLD Activity Score (NAS) stratified by fibrosis stage**

| Fibrosis stage | N  | kPa / NAS |            | P-value |
|----------------|----|-----------|------------|---------|
|                |    | Slope     | 95% CI     |         |
| 0              | 94 | -1.7      | -3.1, -0.3 | 0.02    |
| 1              | 99 | 0.6       | 0.1, 1.0   | 0.01    |
| 2              | 73 | 0.2       | -0.4, 0.8  | 0.56    |
| 3              | 91 | 1.2       | 0.3, 2.2   | 0.01    |
| 4              | 36 | -4.1      | -7.8, -0.3 | 0.03    |

Note: P-value for test of interaction of fibrosis stage by NAS on LSM < 0.001

**Appendix Table 4. Area under the receiver operating characteristic (AUROC) for liver stiffness measurement assessing fibrosis stage and controlled attenuation parameter assessing steatosis grade by body mass index\* (BMI)**

| Outcome         | Non-event vs event comparison | AUROC                      |                                   |                            | P-value† |
|-----------------|-------------------------------|----------------------------|-----------------------------------|----------------------------|----------|
|                 |                               | BMI < 30 kg/m <sup>2</sup> | BMI ≥ 30 & < 35 kg/m <sup>2</sup> | BMI ≥ 35 kg/m <sup>2</sup> |          |
| Fibrosis stage  |                               | N=107                      | N=118                             | N=163                      |          |
|                 | 0 vs 1-4                      | 0.75                       | 0.81                              | 0.68                       | 0.22     |
|                 | 0-1 vs 2-4                    | 0.80                       | 0.84                              | 0.72                       | 0.08     |
|                 | 0-2 vs 3-4                    | 0.89                       | 0.85                              | 0.77                       | 0.06     |
|                 | 0-3 vs 4                      | 0.96                       | 0.91                              | 0.94                       | 0.50     |
| Steatosis grade |                               | N=104                      | N=104                             | N=145                      |          |
|                 | 0 vs 1-3                      | 0.79                       | 0.90                              | 0.68                       | 0.20     |
|                 | 0-1 vs 2-3                    | 0.80                       | 0.64                              | 0.71                       | 0.07     |
|                 | 0-2 vs 3                      | 0.68                       | 0.55                              | 0.61                       | 0.29     |

\*5 participants had missing bmi data

†Based on test of equality of AUROCs across 3 bmi categories (ROC analysis of independent samples; Stata 15.1, 2017)

| Section/Topic                | Item | Checklist Item                                                                                                                                                                                        | Page  |
|------------------------------|------|-------------------------------------------------------------------------------------------------------------------------------------------------------------------------------------------------------|-------|
| <b>Title and abstract</b>    |      |                                                                                                                                                                                                       |       |
| Title                        | 1    | Identify the study as developing and/or validating a multivariable prediction model, the target population, and the outcome to be predicted.                                                          | 1     |
| Abstract                     | 2    | Provide a summary of objectives, study design, setting, participants, sample size, predictors, outcome, statistical analysis, results, and conclusions.                                               | 3     |
| <b>Introduction</b>          |      |                                                                                                                                                                                                       |       |
| Background and objectives    | 3a   | Explain the medical context (including whether diagnostic or prognostic) and rationale for developing or validating the multivariable prediction model, including references to existing models.      | 4-5   |
|                              | 3b   | Specify the objectives, including whether the study describes the development or validation of the model or both.                                                                                     | 5     |
| <b>Methods</b>               |      |                                                                                                                                                                                                       |       |
| Source of data               | 4a   | Describe the study design or source of data (e.g., randomized trial, cohort, or registry data), separately for the development and validation data sets, if applicable.                               | 5-7   |
|                              | 4b   | Specify the key study dates, including start of accrual; end of accrual; and, if applicable, end of follow-up.                                                                                        | 6     |
| Participants                 | 5a   | Specify key elements of the study setting (e.g., primary care, secondary care, general population) including number and location of centres.                                                          | 6     |
|                              | 5b   | Describe eligibility criteria for participants.                                                                                                                                                       | 5-6   |
|                              | 5c   | Give details of treatments received, if relevant.                                                                                                                                                     | n/a   |
| Outcome                      | 6a   | Clearly define the outcome that is predicted by the prediction model, including how and when assessed.                                                                                                | 7     |
|                              | 6b   | Report any actions to blind assessment of the outcome to be predicted.                                                                                                                                | 6     |
| Predictors                   | 7a   | Clearly define all predictors used in developing or validating the multivariable prediction model, including how and when they were measured.                                                         | 7-8   |
|                              | 7b   | Report any actions to blind assessment of predictors for the outcome and other predictors.                                                                                                            | n/a   |
| Sample size                  | 8    | Explain how the study size was arrived at.                                                                                                                                                            | n/a   |
| Missing data                 | 9    | Describe how missing data were handled (e.g., complete-case analysis, single imputation, multiple imputation) with details of any imputation method.                                                  | 5-7   |
| Statistical analysis methods | 10c  | For validation, describe how the predictions were calculated.                                                                                                                                         | 7     |
|                              | 10d  | Specify all measures used to assess model performance and, if relevant, to compare multiple models.                                                                                                   | 7     |
|                              | 10e  | Describe any model updating (e.g., recalibration) arising from the validation, if done.                                                                                                               | n/a   |
| Risk groups                  | 11   | Provide details on how risk groups were created, if done.                                                                                                                                             | n/a   |
| Development vs. validation   | 12   | For validation, identify any differences from the development data in setting, eligibility criteria, outcome, and predictors.                                                                         | n/a   |
| <b>Results</b>               |      |                                                                                                                                                                                                       |       |
| Participants                 | 13a  | Describe the flow of participants through the study, including the number of participants with and without the outcome and, if applicable, a summary of the follow-up time. A diagram may be helpful. | 7-8   |
|                              | 13b  | Describe the characteristics of the participants (basic demographics, clinical features, available predictors), including the number of participants with missing data for predictors and outcome.    | 6-7   |
|                              | 13c  | For validation, show a comparison with the development data of the distribution of important variables (demographics, predictors and outcome).                                                        | 7-8   |
| Model performance            | 16   | Report performance measures (with CIs) for the prediction model.                                                                                                                                      | 8-11  |
| Model-updating               | 17   | If done, report the results from any model updating (i.e., model specification, model performance).                                                                                                   | n/a   |
| <b>Discussion</b>            |      |                                                                                                                                                                                                       |       |
| Limitations                  | 18   | Discuss any limitations of the study (such as nonrepresentative sample, few events per predictor, missing data).                                                                                      | 13    |
| Interpretation               | 19a  | For validation, discuss the results with reference to performance in the development data, and any other validation data.                                                                             | 11-12 |
|                              | 19b  | Give an overall interpretation of the results, considering objectives, limitations, results from similar studies, and other relevant evidence.                                                        | 11-13 |
| Implications                 | 20   | Discuss the potential clinical use of the model and implications for future research.                                                                                                                 | 13    |
| <b>Other information</b>     |      |                                                                                                                                                                                                       |       |
| Supplementary information    | 21   | Provide information about the availability of supplementary resources, such as study protocol, Web calculator, and data sets.                                                                         | n/a   |
| Funding                      | 22   | Give the source of funding and the role of the funders for the present study.                                                                                                                         | 2     |
